# Supplementary material for: Quantification of Pork, Chicken, Beef, and Sheep Contents in Meat Products Using Duplex Real-Time PCR
Source: MDPI journal article supplement (doi:10.3390/foods12152971), 2023-08-07
Supplement: s1 [file s1]

# Quantification of Pork, Chicken, Beef and Sheep Contents in Meat Products Using Duplex Real-Time PCR

## Supplementary Materials

**Table S1.** Composition of PT samples.

| Sample name | Sample Description                                                                                                   | Date of Distribution |
|-------------|----------------------------------------------------------------------------------------------------------------------|----------------------|
| FAPAS-PT1   | The test material is raw lamb (94%) (freeze-dried) and has been contaminated with goat (3%) and pork (3%).           | 7.2022               |
| FAPAS-PT2   | The test material is raw beef (90%) (freeze-dried) and has been contaminated with equine (5%) (horse) and lamb (5%). | 2.2022               |
| FAPAS-PT3   | The test material is raw chicken (92%) (freeze-dried) and has been contaminated with pork (3%) and turkey (5%).      | 4.2021               |

FAPAS: The Food Analysis Performance Assessment Scheme

**Table S2.** Specificity of the real-time PCR system.

| Species                                             | Expected results |         |      |       |    | Tested results |         |      |       |    |
|-----------------------------------------------------|------------------|---------|------|-------|----|----------------|---------|------|-------|----|
|                                                     | Pork             | Chicken | Beef | Sheep | PC | Pork           | Chicken | Beef | Sheep | PC |
| Cattle ( <i>Bos taurus</i> )                        | ND               | ND      | D    | ND    | D  | ND             | ND      | D    | ND    | D  |
| Chicken ( <i>Gallus gallus</i> )                    | ND               | D       | ND   | ND    | D  | ND             | D       | ND   | ND    | D  |
| Crocodile ( <i>Crocodylus niloticus</i> )           | ND               | ND      | ND   | ND    | D  | ND             | ND      | ND   | ND    | D  |
| Donkey ( <i>Equus asinus</i> )                      | ND               | ND      | ND   | ND    | D  | ND             | ND      | ND   | ND    | D  |
| Duck ( <i>Anatidae</i> )                            | ND               | ND      | ND   | ND    | D  | ND             | ND      | ND   | ND    | D  |
| Goat ( <i>Capra hircus</i> )                        | ND               | ND      | ND   | ND    | D  | ND             | ND      | ND   | ND    | D  |
| Goose ( <i>Anserinae</i> )                          | ND               | ND      | ND   | ND    | D  | ND             | ND      | ND   | ND    | D  |
| Hare ( <i>Lepus europaeus</i> )                     | ND               | ND      | ND   | ND    | D  | ND             | ND      | ND   | ND    | D  |
| Horse ( <i>Equus caballus</i> )                     | ND               | ND      | ND   | ND    | D  | ND             | ND      | ND   | ND    | D  |
| Kangaroo ( <i>Macropodidae</i> )                    | ND               | ND      | ND   | ND    | D  | ND             | ND      | ND   | ND    | D  |
| Ostrich ( <i>Struthio camelus</i> )                 | ND               | ND      | ND   | ND    | D  | ND             | ND      | ND   | ND    | D  |
| Pig ( <i>Sus scrofa domestica</i> )                 | D                | ND      | ND   | ND    | D  | D              | ND      | ND   | ND    | D  |
| Rabbit ( <i>Oryctolagus cuniculus</i> )             | ND               | ND      | ND   | ND    | D  | ND             | ND      | ND   | ND    | D  |
| Red deer ( <i>Cervus elaphus</i> )                  | ND               | ND      | ND   | ND    | D  | ND             | ND      | ND   | ND    | D  |
| Roe deer ( <i>Capreolus capreolus</i> )             | ND               | ND      | ND   | ND    | D  | ND             | ND      | ND   | ND    | D  |
| Sheep ( <i>Ovis aries</i> )                         | ND               | ND      | ND   | D     | D  | ND             | ND      | ND   | D     | D  |
| Turkey ( <i>Meleagris gallopavo</i> )               | ND               | ND      | ND   | ND    | D  | ND             | ND      | ND   | ND    | D  |
| Wild boar ( <i>Sus scrofa scrofa</i> )              | D                | ND      | ND   | ND    | D  | D              | ND      | ND   | ND    | D  |
| Black mustard ( <i>Brassica nigra</i> )             | ND               | ND      | ND   | ND    | D  | ND             | ND      | ND   | ND    | D  |
| Broccoli ( <i>Brassica oleracea</i> )               | ND               | ND      | ND   | ND    | D  | ND             | ND      | ND   | ND    | D  |
| Carrot ( <i>Daucus carota</i> )                     | ND               | ND      | ND   | ND    | D  | ND             | ND      | ND   | ND    | D  |
| Celery ( <i>Apium graveolens</i> )                  | ND               | ND      | ND   | ND    | D  | ND             | ND      | ND   | ND    | D  |
| chili pepper ( <i>Capsicum sp.</i> )                | ND               | ND      | ND   | ND    | D  | ND             | ND      | ND   | ND    | D  |
| garlic ( <i>Allium sativum</i> )                    | ND               | ND      | ND   | ND    | D  | ND             | ND      | ND   | ND    | D  |
| ginger ( <i>Zingiber officinale</i> )               | ND               | ND      | ND   | ND    | D  | ND             | ND      | ND   | ND    | D  |
| Kailan ( <i>Brassica oleracea var. alboglabra</i> ) | ND               | ND      | ND   | ND    | D  | ND             | ND      | ND   | ND    | D  |
| onion ( <i>Allium cepa</i> )                        | ND               | ND      | ND   | ND    | D  | ND             | ND      | ND   | ND    | D  |
| parsley ( <i>Petroselinum crispum</i> )             | ND               | ND      | ND   | ND    | D  | ND             | ND      | ND   | ND    | D  |
| rapeseed ( <i>Brassica napus</i> )                  | ND               | ND      | ND   | ND    | D  | ND             | ND      | ND   | ND    | D  |
| rice ( <i>Oryza sativa</i> )                        | ND               | ND      | ND   | ND    | D  | ND             | ND      | ND   | ND    | D  |
| rosemary ( <i>Rosmarinus officinalis</i> )          | ND               | ND      | ND   | ND    | D  | ND             | ND      | ND   | ND    | D  |
| rye ( <i>Secale cereale</i> )                       | ND               | ND      | ND   | ND    | D  | ND             | ND      | ND   | ND    | D  |
| tomato ( <i>Solanum lycopersicum</i> )              | ND               | ND      | ND   | ND    | D  | ND             | ND      | ND   | ND    | D  |
| wheat ( <i>Triticum aestivum</i> )                  | ND               | ND      | ND   | ND    | D  | ND             | ND      | ND   | ND    | D  |
| cabbage ( <i>B rassica oleracea var. oleracea</i> ) | ND               | ND      | ND   | ND    | D  | ND             | ND      | ND   | ND    | D  |
| shiitake mushroom ( <i>Lentinula edodes</i> )       | ND               | ND      | ND   | ND    | D  | ND             | ND      | ND   | ND    | D  |

PC: internal positive amplification control on the 18S rRNA gene; ND: not detected. The genomic DNA for cattle (*Bos taurus*), chicken (*Gallus gallus*), pig (*Sus scrofa domestica*), sheep (*Ovis aries*) and duck (*Anatidae*) were extracted using the DNeasy Blood & Tissue Kit (Qiagen, Hilden, Germany); genomic DNA from other common food ingredients: black mustard (*Brassica nigra*), broccoli (*Brassica oleracea*), carrot (*Daucus carota*), celery (*Apium graveolens*), chili pepper (*Capsicum sp.*), garlic (*Allium sativum*), ginger (*Zingiber officinale*), Kailan (*Brassica oleracea var. alboglabra*), onion (*Allium cepa*), parsley (*Petroselinum crispum*), rapeseed (*Brassica napus*), rice (*Oryza sativa*), rosemary (*Rosmarinus officinalis*), rye (*Secale cereale*), tomato (*Solanum lycopersicum*), wheat (*Triticum aestivum*), cabbage (*B rassica oleracea var. oleracea*), and shiitake mushroom (*Lentinula edodes*) were extracted using CTAB method described in section 2.2; the genomic DNA solution for crocodile (*Crocodylus niloticus*), donkey (*Equus asinus*), goat (*Capra hircus*), goose (*Anserinae*), hare (*Lepus europaeus*), horse (*Equus caballus*), kangaroo (*Macropodidae*), ostrich (*Struthio camelus*), rabbit (*Oryctolagus cuniculus*), red deer (*Cervus elaphus*), roe deer (*Capreolus capreolus*), turkey (*Meleagris gallopavo*) and wild boar (*Sus scrofa scrofa*) were purchased from Eurofins Scientific (France).

**Table S3.** Performance comparison of our duplex qPCR assays to other reported method.

| Parameters                      | Duplex qPCR<br>developed in this<br>study | Multiplex qPCR<br>reported by Köppel R.et<br>al. 2013 [24] | Multiplex qPCR<br>reported by Köppel<br>R.et al. 2020 [25] |
|---------------------------------|-------------------------------------------|------------------------------------------------------------|------------------------------------------------------------|
| Amplification<br>efficiencies % | 98.7 - 104.5                              | 59 - 107                                                   | 89 - 97                                                    |
| Correlation R <sup>2</sup>      | 0.99 - 1.0                                | 0.96 - 0.98                                                | 0.98 - 1.0                                                 |
| Precision ± %                   | 2.45 – 24.58                              | 15 - 24                                                    | 4.09-103.23                                                |
| Accuracy ± %                    | 0.14 – 24.07                              | 4.1 - 167.7                                                | 1.0 – 102.1                                                |

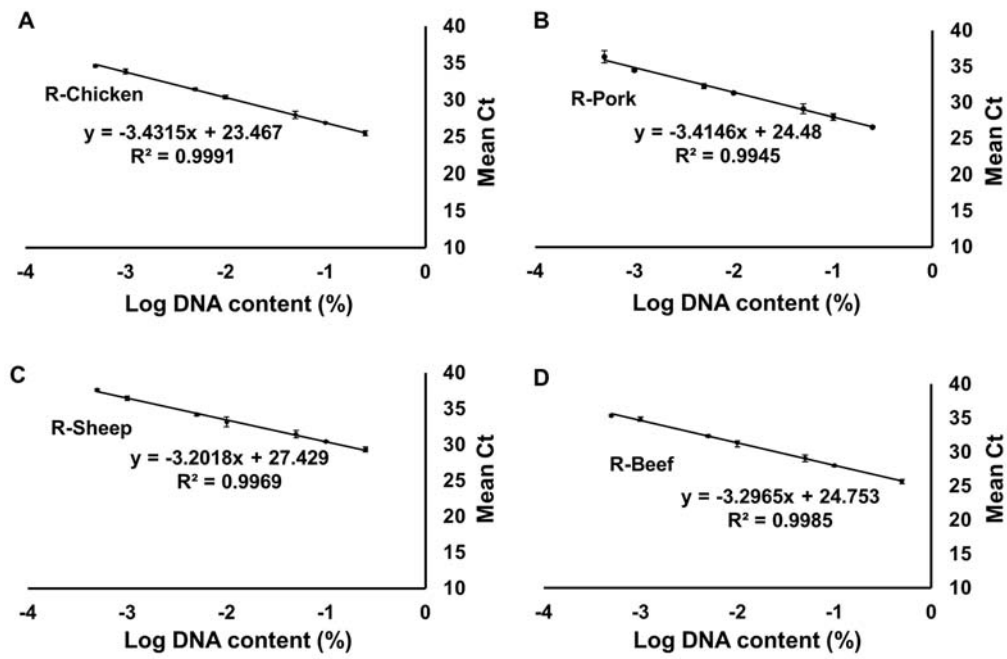

**Figure S1.** Standard curves plotted by the mean Ct values against 7 dilution series (25%, 10%, 5%, 1%, 0.5%, 0.1% and 0.05%) using singplex qPCR for chicken (A), pork (B), sheep (C) and beef (D). A DNA mixture consisting of 25% pork, 25% chicken, 25% beef and 25% sheep (20 ng/ $\mu$ L) was serially diluted in herring sperm DNA solution (20 ng/ $\mu$ L) and analyzed in 6 replicates.

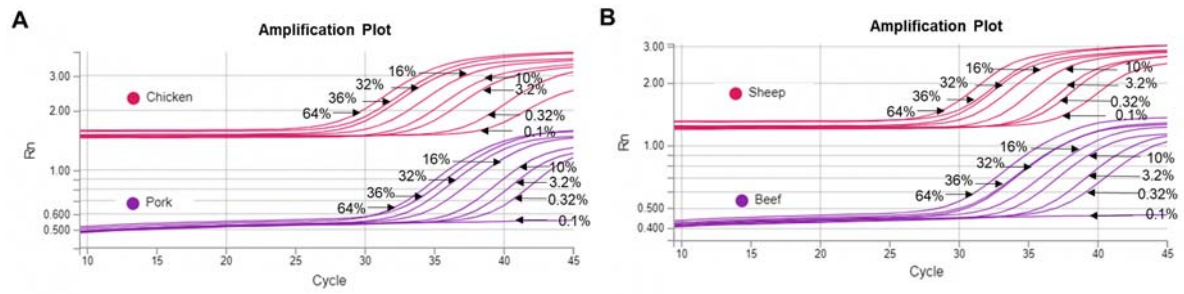

**Figure S2.** The real-time PCR data of amplification curves for boiled meat using serial diluted DNA. (A) Amplification curves for boiled chicken and pork; (B) Amplification curves for boiled beef and sheep. For serially diluted DNA, 0.32 ng of DNA were detected for all boiled meat species.
